## Highlights

### **Brain Alterations in COVID Recovered Revealed by Susceptibility-Weighted Magnetic Resonance Imaging.**

Sapna S Mishra,Rakibul Hafiz,Rohit Misra,Tapan K. Gandhi,Alok Prasad,Vidur Mahajan,Bharat B. Biswal

- Susceptibility weighted imaging is used for neuroimaging study of Long COVID.
- A group-level study is performed to analyze the effects of COVID on the brain.
- COVID survivors showed susceptibility differences in the frontal lobe and brainstem.
- Analyzed the relationship between MRI data of COVID survivors and fatigue scores.
